# Supplementary material
Source: MDPI journal article supplement (https://www.mdpi.com/2311-7524/10/5/458)
Supplement: s1 [file s1]

**Figure S1:** Dendrogram of calafate and related *Berberis* species from Chile analyzed with 10 SSR markers.

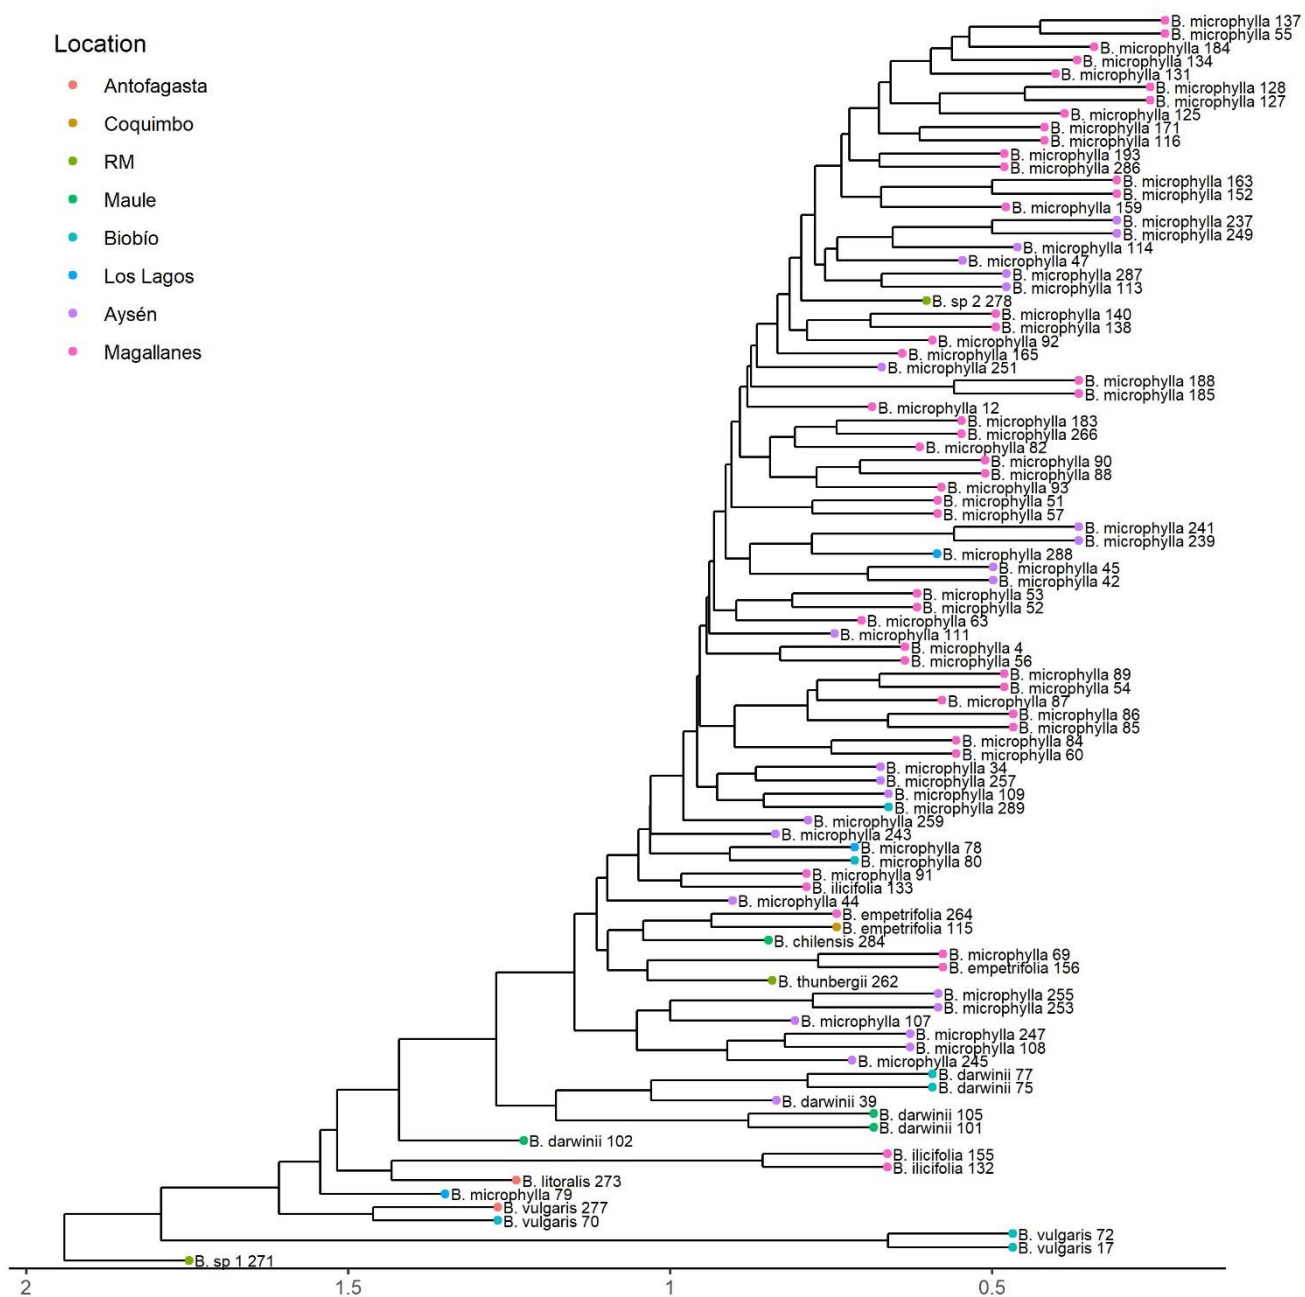

**Table S1:** Individual hydroxycinnamic acid concentrations ( $\mu\text{mol g}^{-1}$ ) in Calafate fruits. Where: CGI: Caffeoylglucaric acid isomer, CQ: caffeoylquinic acid, Dcgluc: dicaffeoylglucaric acid isomer, DCQ: dicaffeoylquinic acid isomer, nd: no detected

| Sample                   | Sampling place            | CGI  | CGI  | CGI  | CGI  | CQ   | 5CQ  | 4CQ  | Dcgluc | 3,5DCQ | 4,5DCQ |
|--------------------------|---------------------------|------|------|------|------|------|------|------|--------|--------|--------|
| <b>Magallanes Region</b> |                           |      |      |      |      |      |      |      |        |        |        |
| 1                        | Fte Bulnes                | 0.40 | 0.63 | 0.23 | 0.10 | 0.20 | 0.83 | 0.11 | 0.11   | 0.26   | 0.22   |
| 2                        | Río San Luis              | 0.18 | 0.73 | 0.06 | 0.09 | 0.16 | 1.60 | 0.11 | 0.40   | 0.61   | 0.21   |
| 3                        | Río San Luis              | 0.13 | 0.55 | 0.28 | 0.05 | 0.19 | 1.28 | 0.10 | 0.05   | 0.48   | 0.25   |
| 4                        | Camino Faro San Isidro    | 0.22 | 0.68 | 0.22 | 0.07 | 0.20 | 1.21 | 0.13 | 0.19   | 0.30   | 0.19   |
| 5                        | Camino Parrillar km 10    | 0.38 | 1.08 | 0.87 | 0.09 | 0.39 | 1.92 | 0.22 | 0.00   | 0.28   | 0.81   |
| 6                        | Camino Parrillar km 11    | 0.32 | 0.92 | 0.75 | 0.12 | 0.33 | 1.95 | 0.23 | 0.00   | 0.64   | 0.53   |
| 7                        | Camino Res For Magallanes | 0.48 | 1.36 | 0.70 | 0.12 | 0.45 | 2.33 | 0.30 | 0.67   | 0.47   | 0.31   |
| 8                        | Lote 15 Kampenaike        | 0.88 | 1.35 | 1.25 | 0.22 | 0.51 | 1.65 | 0.38 | 0.18   | 0.47   | 0.28   |
| 9                        | Lote 15 Kampenaike        | 0.54 | 1.17 | 0.37 | 0.17 | 0.33 | 0.74 | 0.27 | 0.61   | 0.02   | 0.13   |
| 10                       | Lote 15 Kampenaike        | 1.07 | 1.88 | 0.42 | 0.29 | 0.46 | 1.43 | 0.33 | nd     | 0.16   | 0.54   |
| 11                       | Punta Prat, Seno Otway    | 0.59 | 0.91 | 0.68 | 0.13 | 0.36 | 1.26 | 0.24 | nd     | 0.31   | 0.30   |
| 12                       | Parque Chabunco           | 0.45 | 1.22 | 0.88 | 0.25 | 0.44 | 1.50 | 0.31 | 0.09   | 0.58   | 0.60   |
| 13                       | Sector Aeropuerto         | 0.31 | 0.90 | 0.60 | 0.12 | 0.38 | 1.82 | 0.22 | 0.06   | 0.16   | 0.50   |
| <b>Aysén Region</b>      |                           |      |      |      |      |      |      |      |        |        |        |
| 14                       | Puerto Tranquilo          | 0.06 | 0.11 | 0.17 | 0.03 | 0.03 | 0.05 | 0.09 | 0.00   | 0.09   | 0.04   |
| 15                       | Sta Elena                 | 0.15 | 0.27 | 0.21 | 0.07 | 0.06 | 0.10 | 0.06 | 0.23   | 0.13   | 0.07   |
| 16                       | Sta Elena                 | 0.31 | 0.59 | 0.36 | 0.14 | 0.17 | 0.61 | 0.12 | 0.38   | 0.19   | 0.20   |
| 17                       | Sta. Elena                | 0.17 | 0.31 | 0.34 | 0.06 | 0.09 | 0.20 | 0.07 | 0.19   | 0.20   | 0.12   |
| 18                       | Ceballo                   | 0.03 | 0.06 | 0.07 | 0.02 | 0.02 | 0.04 | 0.03 | nd     | 0.03   | 0.01   |
| 19                       | Ceballo                   | 0.08 | 0.17 | 0.16 | 0.07 | 0.04 | 0.32 | 0.05 | 0.06   | 0.05   | nd     |
| 20                       | Valle Simpson             | 0.27 | 0.54 | 0.43 | 0.09 | 0.17 | 0.83 | 0.13 | 0.18   | 0.27   | 0.18   |
| 21                       | Valle Simpson             | 0.44 | 0.79 | 0.79 | 0.18 | 0.28 | 0.52 | 0.22 | 0.20   | 0.36   | 0.28   |
| 22                       | Sector Chacra             | 0.05 | 0.10 | 0.17 | 0.04 | 0.03 | 0.15 | 0.04 | 0.06   | 0.05   | nd     |
| 23                       | Sector Chacra Chile Chico | 0.02 | 0.06 | 0.12 | 0.03 | 0.03 | 0.11 | 0.03 | 0.03   | 0.02   | nd     |
| 24                       | Aeródromo Chile Chico     | 0.03 | 0.07 | 0.11 | 0.03 | 0.02 | 0.09 | 0.03 | 0.04   | 0.04   | nd     |
| 25                       | Puerto Tranquilo          | 0.14 | 0.27 | 0.27 | 0.09 | 0.07 | 0.29 | 0.06 | 0.55   | 0.13   | 0.10   |

**Table S2:** Individual anthocyanin concentrations ( $\mu\text{mol g}^{-1}$ ) in Calafate fruits. Where: dp: delphinidin, cy: cyanidin, pt: petunidin, pe: peonidin, mv: malvidin, gl: glucoside, ru: rutinoside, nd: no detected

| Sample                   | Sampling place            | dp-3-gl | dp-3-ru | cy-3-gl | cy-3-ru | pt-3-gl | pt-3-ru | pe-3-gl | pe-3-ru | mv-3-gl | mv-3-ru |
|--------------------------|---------------------------|---------|---------|---------|---------|---------|---------|---------|---------|---------|---------|
| <b>Magallanes Region</b> |                           |         |         |         |         |         |         |         |         |         |         |
| 1                        | Fte Bulnes                | 10.78   | 1.05    | 0.85    | 0.16    | 4.57    | 0.86    | 0.28    | 0,10    | 1.96    | 0.45    |
| 2                        | Río San Luis              | 3.09    | 0.34    | 0.50    | 0.11    | 1.27    | 0.26    | 0.12    | 0,00    | 0.55    | 0.12    |
| 3                        | Río San Luis              | 2.45    | 0.25    | 0.46    | 0.10    | 1.25    | 0.26    | 0.16    | 0,00    | 0.64    | 0.17    |
| 4                        | Camino Faro San Isidro    | 7.03    | 0.76    | 1.15    | 0.21    | 2.93    | 0.65    | 0.28    | 0,00    | 1.30    | 0.32    |
| 5                        | Camino Parrillar km 10    | 6.31    | 0.41    | 1.02    | 0.13    | 2.85    | 0.39    | 0.28    | 0,00    | 1.04    | 0.19    |
| 6                        | Camino Parrillar km 11    | 5.45    | 0.51    | 0.65    | 0.14    | 2.74    | 0.53    | 0.21    | 0,00    | 1.32    | 0.28    |
| 7                        | Camino Res For Magallanes | 3.05    | 0.34    | 0.55    | 0.13    | 1.57    | 0.33    | 0.19    | 0,00    | 0.74    | 0.18    |
| 8                        | Lote 15 Kampenaike        | 5.01    | 0.56    | 0.62    | 0.16    | 3.15    | 0.62    | 0.28    | 0,00    | 2.28    | 0.47    |
| 9                        | Lote 15 Kampenaike        | 10.93   | 1.32    | 1.29    | 0.28    | 6.65    | 1.52    | 0.38    | 0,00    | 3.40    | 0.78    |
| 10                       | Lote 15 Kampenaike        | 8.51    | 0.74    | 1.00    | 0.19    | 5.04    | 0.76    | 0.40    | 0,00    | 3.10    | 0.48    |
| 11                       | Punta Prat, Seno Otway    | 7.23    | 0.71    | 0.89    | 0.17    | 4.35    | 0.72    | 0.32    | 0,00    | 2.68    | 0.44    |
| 12                       | Parque Chabunco           | 12.51   | 1.43    | 1.17    | 0.26    | 5.07    | 1.06    | 0.46    | 0,00    | 3.01    | 0.69    |
| 13                       | Sector Aeropuerto         | 11.19   | 1.32    | 1.23    | 0.24    | 4.83    | 1.10    | 0.43    | 0,00    | 2.80    | 0.71    |
| <b>Aysén region</b>      |                           |         |         |         |         |         |         |         |         |         |         |
| 14                       | Puerto Tranquilo          | 12.81   | 1.09    | 1.88    | 0.37    | 7.33    | 1.07    | 0.88    | 0,00    | 5.36    | 0.89    |
| 15                       | Sta Elena                 | 7.94    | 0.69    | 0.89    | nd      | 4.91    | 0.72    | 0.39    | 0,00    | 2.92    | 0.43    |
| 16                       | Sta Elena                 | 9.30    | 1.03    | 1.48    | nd      | 5.86    | 1.03    | 0.79    | 0,00    | 7.29    | 1.06    |
| 17                       | Sta. Elena                | 9.74    | 0.83    | 1.12    | nd      | 6.32    | 0.94    | 0.50    | 0,00    | 3.88    | 0.59    |
| 18                       | Ceballo                   | 1.50    | 0.42    | 0.35    | nd      | 0.68    | 0.36    | 0.00    | 0,00    | 0.31    | 0.18    |
| 19                       | Ceballo                   | 5.56    | 1.49    | 0.83    | nd      | 2.21    | 1.25    | 0.00    | 0,00    | 0.63    | 0.43    |
| 20                       | Valle Simpson             | 9.88    | 0.84    | 1.35    | nd      | 5.92    | 0.87    | 0.54    | 0,00    | 3.94    | 0.52    |
| 21                       | Valle Simpson             | 11.38   | 0.81    | 1.60    | 0.28    | 7.03    | 1.03    | 0.68    | 0,00    | 5.94    | 0.80    |
| 22                       | Sector Chacra             | 4.52    | 1.31    | 0.65    | nd      | 1.96    | 1.23    | nd      | nd      | 0.81    | 0.59    |
| 23                       | Sector Chacra Chile Chico | 3.52    | 1.43    | 0.56    | nd      | 1.37    | 1.04    | nd      | nd      | 0.52    | 0.45    |
| 24                       | Aeródromo Chile Chico     | 4.01    | 1.57    | 0.68    | nd      | 1.41    | 0.97    | nd      | nd      | 0.47    | 0.34    |
| 25                       | Puerto Tranquilo          | 11.70   | 1.01    | 1.39    | nd      | 7.54    | 1.08    | 0.63    | nd      | 5.55    | 0.77    |

**Table S3:** Individual flavonol concentrations ( $\mu\text{mol g}^{-1}$ ) in Calafate fruits. Where: Q: quercetin, Iso-rham: isorhamnetin, ru: rutinose, mal: malonyl, gal: galactoside, glu: glucoside, nd: no detected

| Sample            |                           | Q-3-ru | Q-3-gal | Q-3-glu | Q-3-mal-gal | Q-3-mal-glu | Iso-rham-ru | Iso-rham-gal | Q-3-rham | Iso-rham-glu | Iso-rham-mal-gal | Iso-rham-mal-glu |
|-------------------|---------------------------|--------|---------|---------|-------------|-------------|-------------|--------------|----------|--------------|------------------|------------------|
| Sampling place    |                           |        |         |         |             |             |             |              |          |              |                  |                  |
| Magallanes Region |                           |        |         |         |             |             |             |              |          |              |                  |                  |
| 1                 | Fte Bulnes                | 0.50   | 0.26    | 0.13    | 0.09        | 0.19        | 0.14        | 0.03         | 0.27     | 0.03         | 0.04             | 0.06             |
| 2                 | Río San Luis              | 0.20   | 0.23    | 0.06    | 0.03        | 0.14        | 0.07        | 0.02         | 0.22     | 0.02         | nd               | 0.06             |
| 3                 | Río San Luis              | 0.24   | 0.18    | 0.07    | 0.04        | 0.13        | 0.07        | 0.02         | 0.58     | 0.03         | nd               | 0.03             |
| 4                 | Camino Faro San Isidro    | 0.35   | 0.23    | 0.11    | 0.07        | 0.16        | 0.15        | 0.04         | 0.30     | 0.04         | nd               | 0.05             |
| 5                 | Camino Parrillar km 10    | 0.54   | 0.71    | 0.19    | 0.07        | 0.49        | nd          | nd           | 0.30     | nd           | nd               | 0.03             |
| 6                 | Camino Parrillar km 11    | 0.74   | 0.32    | 0.22    | 0.11        | 0.17        | 0.43        | 0.06         | 0.40     | 0.06         | nd               | 0.12             |
| 7                 | Camino Res For Magallanes | 0.45   | 0.27    | 0.12    | 0.06        | 0.14        | 0.30        | 0.07         | 0.50     | 0.06         | 0.13             | 0.10             |
| 8                 | Lote 15 Kampenaike        | 0.39   | 0.18    | 0.10    | 0.04        | 0.08        | 0.34        | 0.08         | nd       | 0.03         | 0.08             | 0.05             |
| 9                 | Lote 15 Kampenaike        | 0.68   | 0.49    | 0.17    | 0.06        | 0.16        | 0.18        | 0.04         | nd       | nd           | nd               | 0.04             |
| 10                | Lote 15 Kampenaike        | 0.34   | 0.43    | 0.14    | 0.06        | 0.28        | 0.19        | 0.08         | 0.15     | 0.05         | 0.13             | 0.06             |
| 11                | Punta Prat, Seno Otway    | 0.48   | 0.31    | 0.14    | 0.08        | 0.22        | 0.15        | 0.04         | 0.22     | 0.04         | nd               | 0.10             |
| 12                | Parque Chabunco           | 0.35   | 0.07    | 0.11    | 0.08        | 0.06        | 0.11        | 0.01         | 0.10     | 0.03         | nd               | 0.05             |
| 13                | Sector Aeropuerto         | 0.43   | 0.23    | 0.08    | 0.04        | 0.14        | 0.07        | 0.01         | 0.01     | 0.01         | nd               | 0.02             |
| Aysén Region      |                           |        |         |         |             |             |             |              |          |              |                  |                  |
| 14                | Puerto Tranquilo          | 0.07   | 0.08    | 0.06    | 0.02        | 0.04        | 0.07        | 0.03         | 0.01     | 0.02         | 0.03             | 0.03             |
| 15                | Sta Elena                 | 0.15   | 0.08    | 0.05    | 0.03        | 0.04        | 0.16        | 0.03         | 0.09     | 0.03         | 0.05             | 0.04             |
| 16                | Sta Elena                 | 0.20   | 0.06    | 0.09    | 0.05        | 0.04        | 0.27        | 0.01         | 0.01     | 0.06         | nd               | 0.08             |
| 17                | Sta. Elena                | 0.31   | 0.11    | 0.11    | 0.07        | 0.06        | 0.26        | 0.03         | 0.16     | 0.06         | nd               | 0.08             |
| 18                | Ceballo                   | 0.07   | 0.04    | 0.03    | 0.01        | 0.04        | 0.39        | 0.07         | nd       | 0.02         | 0.01             | 0.01             |
| 19                | Ceballo                   | 0.21   | 0.27    | 0.14    | 0.02        | nd          | 0.41        | 0.17         | nd       | nd           | nd               | nd               |
| 20                | Valle Simpson             | 0.31   | 0.10    | 0.09    | 0.05        | 0.06        | 0.13        | 0.02         | 0.01     | 0.03         | nd               | 0.04             |
| 21                | Valle Simpson             | 0.45   | 0.10    | 0.14    | 0.09        | 0.06        | 0.16        | 0.02         | 0.11     | 0.04         | nd               | 0.06             |
| 22                | Sector Chacra             | 0.12   | 0.10    | 0.06    | 0.01        | 0.04        | 0.42        | 0.10         | nd       | 0.03         | nd               | nd               |
| 23                | Sector Chacra Chile Chico | 0.11   | 0.11    | 0.06    | 0.01        | 0.04        | 0.34        | 0.09         | nd       | 0.03         | nd               | nd               |

|    |                       |      |      |      |      |      |      |      |      |      |      |      |
|----|-----------------------|------|------|------|------|------|------|------|------|------|------|------|
| 24 | Aeródromo Chile Chico | 0.13 | 0.16 | 0.09 | nd   | nd   | 0.36 | 0.14 | nd   | 0.05 | nd   | nd   |
| 25 | Puerto Tranquilo      | 0.13 | 0.20 | 0.06 | 0.03 | 0.10 | 0.07 | 0.04 | 0.01 | 0.02 | 0.05 | 0.03 |

---
